# Supplementary material
Source: Research Square preprint supplement (doi:10.21203/rs.3.rs-9654557/v1)
Supplement: Supplementary file 1 [file ab4d19612c54f9a2c81674b6.docx]

| **Reliability and reproducibility checklist for molecular dynamics simulations**  ***All boxes must be marked YES by acceptance unless “Response not needed if No”.** | | **Yes** | **No** | **Response  (Please state where this information can be found in the text)** |
| --- | --- | --- | --- | --- |
| **1. Convergence of simulations and analysis** | | | | |
| 1a. Is an evaluation presented in the text to show that the property being measured has equilibrated in the simulations (*e.g.* time-course analysis)? | |  |  | Supporting Information Figure S6 |
| 1b. Then, is it described in the text how simulations are split into equilibration and production runs and how much data were analyzed from production runs? | |  |  | Materials and Methods, p. 21-22 |
| 1c. Are there at least 3 simulations per simulation condition with statistical analysis? | |  |  | Not applicable, as only the surface water molecules at the extracellular receptor region were of interest 100 ns of simulation is sufficient for bulk water and hydration shell around a protein. |
| 1d. Is evidence provided in the text that the simulation results presented are independent of initial configuration? | |  |  | Not applicable, as protein conformational changes were not studied, but just water molecules (see 1c). |
| **2. Connection to experiments** | | | | |
| 2a. Are calculations provided that can connect to experiments (*e.g.* loss or gain in function from mutagenesis, binding assays, NMR chemical shifts, J-couplings, SAXS curves, interaction distances or FRET distances, structure factors, diffusion coefficients, bulk modulus and other mechanical properties, *etc*.)? | |  |  | Simulation snapshots were utilized in docking studies, and active compounds were found (measured in FLIPR and TR-FRET assays; p. 6). |
| **3. Method choice** | | | | |
| 3a. Do simulations contain membranes, membrane proteins, intrinsically disordered proteins, glycans, nucleic acids, polymers, or cryptic ligand binding? | |  |  | Studied protein is a membrane protein (GPCR). |
| 3b. Is it described in the text whether the accuracy of the chosen model(s) is sufficient to address the question(s) under investigation (e.g. all-atom vs. coarse-grained models, fixed charge vs. polarizable force fields, implicit vs. explicit solvent or membrane, force field and water model, etc.)? | |  |  | Not discussed, as the utilization of molecular dynamics simulations is not the main focus of the study. The objective of the molecular dynamics study was to obtain water molecules as conformational constraints to the docking models, and for this the utilized simulation method (all-atom simulation with POPC membrane, 100 ns, and TIP3p waters) was sufficient as exemplified by the found hits. |
| 3c. Is the timescale of the event(s) under investigation beyond the brute-force MD simulation timescale in this study that enhanced sampling methods are needed? | |  |  |  |
|  | If **YES**, are the parameters and convergence criteria for the enhanced sampling method clearly stated? |  |  |  |
|  | If **NO,** is the evidence provided in the text? |  |  | See 1c and 3b. |
| **4. Code and reproducibility** | | | | |
| 4a. Is a table provided describing the system setup that includes simulation box dimensions, total number of atoms, total number of water molecules, salt concentration, lipid composition (number of molecules and type)? | |  |  | Supporting Information Figure S6 |
| 4b. Is it described in the text what simulation and analysis software and which versions are used? | |  |  | Materials and Methods, p. 21-22 |
| 4c. Are other parameters for the system setup described in the text, such as protonation state, type of structural restraints if applied, nonbonded cutoff, thermostat and barostat, etc.? | |  |  | Materials and Methods, p. 21-22, Supporting Information Figure S6 |
| 4d. Are initial coordinate and simulation input files and a coordinate file of the final output provided as supplementary files or in a public repository? | |  |  | All simulation snapshots evaluated as part of docking grid generation are provided as supplementary files. |
| 4e. Is there custom code or custom force field parameters? | |  |  | Response not needed if **No** |
|  | If **YES**, are they provided as supplementary files or in a public repository? |  |  |  |
